# Supplementary material
Source: PubMed Central journal article supplement (PMC8111714)
Supplement: 12889_2021_10876_MOESM1_ESM.pdf [file 12889_2021_10876_MOESM1_ESM.pdf]

**Supplementary Table S1**

**Aggregate participant characteristics (across phases) by work/retirement status for the retained groups (N = 1,931 individuals; 5,072 surveys).**

| Characteristic                              | Work/retirement status                      |                                                      |                                            |                                         |                                                    |
|---------------------------------------------|---------------------------------------------|------------------------------------------------------|--------------------------------------------|-----------------------------------------|----------------------------------------------------|
|                                             | Employed<br>(all phases)<br>[2,085 surveys] | Not in<br>workforce<br>(all phases)<br>[246 surveys] | Retired<br>(all phases)<br>[1,980 surveys] | Employed to<br>retired<br>[506 surveys] | Not in<br>workforce to<br>retired<br>[255 surveys] |
| <b>Age</b> Mean (SD)                        | 55.54 (6.66)                                | 55.22 (5.36)                                         | 71.99 (6.85)**                             | 62.65 (5.31)**                          | 61.14 (3.85)**                                     |
| <b>Sex</b>                                  |                                             |                                                      |                                            |                                         |                                                    |
| Male                                        | 44.7%                                       | 45.5%                                                | 39.8%*                                     | 42.1%                                   | 32.2%**                                            |
| Female                                      | 55.3%                                       | 54.5%                                                | 60.2%                                      | 57.9%                                   | 67.8%                                              |
| <b>Live on a farm</b>                       |                                             |                                                      |                                            |                                         |                                                    |
| No                                          | 67.4%                                       | 85.1%**                                              | 89.4%**                                    | 77.8%**                                 | 89.6%**                                            |
| Yes                                         | 32.6%                                       | 14.9%                                                | 10.6%                                      | 22.2%                                   | 10.4%                                              |
| <b>Any chronic disease</b>                  |                                             |                                                      |                                            |                                         |                                                    |
| No                                          | 56.9%                                       | 47.6%*                                               | 25.8%**                                    | 38.7%**                                 | 34.1%**                                            |
| Yes                                         | 43.1%                                       | 52.4%                                                | 74.2%                                      | 61.3%                                   | 65.9%                                              |
| <b>Currently married</b>                    |                                             |                                                      |                                            |                                         |                                                    |
| No                                          | 17.7%                                       | 31.8%**                                              | 30.4%**                                    | 16.3%                                   | 31.8%**                                            |
| Yes                                         | 82.3%                                       | 68.2%                                                | 69.6%                                      | 83.7%                                   | 68.2%                                              |
| <b>Recent adverse life events</b> Mean (SD) | 1.19 (1.20)                                 | 1.58 (1.51)**                                        | 0.98 (1.13)**                              | 1.15 (1.24)                             | 1.31 (1.25)                                        |
| 0-2                                         | 86.5%                                       | 75.3%**                                              | 91.1%**                                    | 87.5%                                   | 83.5%                                              |
| 3-5                                         | 13.0%                                       | 21.4%                                                | 8.3%                                       | 12.1%                                   | 16.1%                                              |
| 6-9                                         | 0.5%                                        | 3.3%                                                 | 0.7%                                       | 0.4%                                    | 0.4%                                               |
| <b>ARIA</b> Mean (SD)                       | 4.30 (3.29)                                 | 4.15 (3.39)                                          | 3.76 (2.94)**                              | 3.66 (2.92)**                           | 3.82 (3.12)                                        |
| Inner regional                              | 36.1%                                       | 39.4%                                                | 45.0%**                                    | 41.9%                                   | 43.9%*                                             |
| Outer regional                              | 37.6%                                       | 38.6%                                                | 33.7%                                      | 37.4%                                   | 38.8%                                              |
| Remote                                      | 19.3%                                       | 13.4%                                                | 17.5%                                      | 16.2%                                   | 14.1%                                              |
| Very remote                                 | 7.0%                                        | 8.5%                                                 | 3.7%                                       | 4.5%                                    | 3.1%                                               |

*Note:* ARIA, Accessibility/Remoteness Index of Australia Plus. Reported statistical tests are based on comparisons with the ‘Employed (all phases)’ group (*Reference category*), comprising either paired chi-square tests or planned comparisons from Analyses of Variance: \* $p < 0.01$ ; \*\* $p < 0.001$ . For example, the ‘Retired (all phases)’ group differed from the reference group on all of the tabled characteristics, being older, more likely to be female or to have a chronic disease, and less likely to be currently married, to live on a farm, to have reported recent adverse events, or to live in more remote locations.

## Supplementary Table S2

Outcome variable profiles (Means, SD) by aggregate work/retirement status and phase (N = 1,931).

| Outcome variable<br>[Global ratings (1 to 5)] by<br>Work/retirement status | Data source: |                     |                     |                     |             |
|----------------------------------------------------------------------------|--------------|---------------------|---------------------|---------------------|-------------|
|                                                                            | Baseline     | 1-year<br>follow-up | 3-year<br>follow-up | 5-year<br>follow-up | All phases  |
| <b>Physical health:</b>                                                    |              |                     |                     |                     |             |
| Employed (all phases)                                                      | 3.42 (0.94)  | 3.25 (0.90)         | 3.21 (0.90)         | 3.21 (0.90)         | 3.30 (0.92) |
| Not in workforce (all phases)                                              | 2.49 (0.97)  | 2.60 (1.02)         | 2.58 (0.97)         | 2.13 (1.13)         | 2.50 (0.99) |
| Retired (all phases)                                                       | 3.16 (0.97)  | 2.97 (0.91)         | 3.09 (0.92)         | 3.00 (0.90)         | 3.07 (0.94) |
| Employed to retired                                                        | 3.44 (0.91)  | 3.16 (0.91)         | 3.31 (0.91)         | 3.34 (0.99)         | 3.31 (0.93) |
| Not in workforce to retired                                                | 2.94 (1.12)  | 2.76 (0.97)         | 3.03 (0.93)         | 2.92 (1.00)         | 2.91 (1.01) |
| <b>Functioning:</b>                                                        |              |                     |                     |                     |             |
| Employed (all phases)                                                      | 3.75 (0.93)  | 3.72 (0.89)         | 3.79 (0.91)         | 3.60 (0.94)         | 3.73 (0.92) |
| Not in workforce (all phases)                                              | 2.76 (1.07)  | 2.90 (1.10)         | 2.79 (1.06)         | 2.67 (1.11)         | 2.79 (1.07) |
| Retired (all phases)                                                       | 3.61 (1.05)  | 3.50 (1.04)         | 3.65 (1.01)         | 3.38 (1.01)         | 3.55 (1.04) |
| Employed to retired                                                        | 3.83 (1.04)  | 3.72 (0.95)         | 3.96 (0.86)         | 3.80 (0.94)         | 3.82 (0.95) |
| Not in workforce to retired                                                | 3.17 (1.13)  | 3.26 (1.09)         | 3.31 (0.92)         | 3.13 (1.08)         | 3.22 (1.05) |
| <b>Financial position:</b>                                                 |              |                     |                     |                     |             |
| Employed (all phases)                                                      | 2.86 (0.72)  | 2.85 (0.68)         | 2.91 (0.76)         | 2.94 (0.76)         | 2.88 (0.72) |
| Not in workforce (all phases)                                              | 2.19 (0.73)  | 2.19 (0.73)         | 1.92 (0.65)         | 2.13 (1.06)         | 2.16 (0.75) |
| Retired (all phases)                                                       | 2.81 (0.76)  | 2.80 (0.70)         | 2.81 (0.68)         | 2.89 (0.68)         | 2.82 (0.72) |
| Employed to retired                                                        | 3.11 (0.84)  | 2.95 (0.69)         | 2.99 (0.74)         | 2.94 (0.76)         | 3.00 (0.76) |
| Not in workforce to retired                                                | 2.55 (0.75)  | 2.65 (0.77)         | 2.51 (0.77)         | 2.55 (0.72)         | 2.56 (0.75) |
| <b>Mental health:</b>                                                      |              |                     |                     |                     |             |
| Employed (all phases)                                                      | 3.60 (0.97)  | 3.53 (0.91)         | 3.54 (0.92)         | 3.46 (0.96)         | 3.55 (0.95) |
| Not in workforce (all phases)                                              | 2.89 (1.15)  | 2.98 (1.14)         | 2.92 (1.44)         | 2.93 (1.10)         | 2.92 (1.17) |
| Retired (all phases)                                                       | 3.75 (0.93)  | 3.67 (0.96)         | 3.74 (0.94)         | 3.53 (0.90)         | 3.69 (0.94) |
| Employed to retired                                                        | 3.70 (0.99)  | 3.55 (1.05)         | 3.71 (1.01)         | 3.62 (0.99)         | 3.65 (1.01) |
| Not in workforce to retired                                                | 3.58 (1.05)  | 3.39 (1.12)         | 3.47 (1.04)         | 3.43 (1.05)         | 3.47 (1.06) |
| <b>Relationships:</b>                                                      |              |                     |                     |                     |             |
| Employed (all phases)                                                      | 3.87 (0.89)  | 3.77 (0.82)         | 3.84 (0.85)         | 3.70 (0.91)         | 3.81 (0.87) |
| Not in workforce (all phases)                                              | 3.48 (1.09)  | 3.55 (1.13)         | 3.71 (1.23)         | 3.53 (1.25)         | 3.52 (1.12) |
| Retired (all phases)                                                       | 4.11 (0.83)  | 3.94 (0.86)         | 4.05 (0.84)         | 3.93 (0.89)         | 4.03 (0.85) |
| Employed to retired                                                        | 4.02 (0.87)  | 3.88 (0.80)         | 4.11 (0.83)         | 3.92 (0.92)         | 3.98 (0.86) |
| Not in workforce to retired                                                | 3.48 (1.19)  | 3.71 (0.97)         | 3.63 (0.92)         | 3.53 (0.89)         | 3.59 (1.00) |
| <b>Satisfaction with life:</b>                                             |              |                     |                     |                     |             |
| Employed (all phases)                                                      | 3.70 (0.86)  | 3.68 (0.77)         | 3.71 (0.80)         | 3.59 (0.84)         | 3.68 (0.82) |
| Not in workforce (all phases)                                              | 3.09 (1.05)  | 3.16 (0.92)         | 3.04 (1.16)         | 3.07 (1.10)         | 3.10 (1.03) |
| Retired (all phases)                                                       | 3.86 (0.79)  | 3.78 (0.80)         | 3.86 (0.77)         | 3.69 (0.83)         | 3.81 (0.80) |
| Employed to retired                                                        | 3.83 (0.81)  | 3.65 (0.88)         | 3.91 (0.71)         | 3.80 (0.81)         | 3.79 (0.81) |
| Not in workforce to retired                                                | 3.60 (1.01)  | 3.48 (0.88)         | 3.53 (0.85)         | 3.57 (0.87)         | 3.55 (0.90) |

*Note:* These outcome profiles are illustrated in Figures 1 and 2. There were moderate correlations between the global health ratings, with the strongest associations being between mental health and satisfaction with life (0.64), relationships (0.62) and functioning (0.59), and between physical health and functioning (0.65). Correlations with perceived financial status were lower, ranging from 0.20 to 0.32.
